# Supplementary material for: Co(ii), Ni(ii) and Cu(ii) complexes with phenylthiazole and thiosemicarbazone-derived ligands: synthesis, structure and cytotoxic effects
Source: Royal Society of Chemistry journal article supplement (doi:10.1039/c4nj00977k), 2014-09-03
Supplement: c4nj00977k1.pdf [file c4nj00977k1.pdf]

## Electronic Supplementary Material (ESI) for New Journal of Chemistry

### Supplementary information

#### Co(II), Ni(II) and Cu(II) complexes with phenylthiazole and thiosemicarbazone-derived ligands: synthesis, structure and cytotoxic effect

Marta Sobiesiak<sup>a\*</sup>, Tadeusz Muzioł<sup>b</sup>, Marek Rozalski<sup>c</sup>, Urszula Krajewska<sup>c</sup>, Elzbieta Budzisz<sup>d</sup>

<sup>a</sup>Collegium Medicum in Bydgoszcz, Nicolaus Copernicus University in Torun, Faculty of Pharmacy, Department of Inorganic and Analytical Chemistry, dr. A. Jurasza 2, 85-094 Bydgoszcz, Poland

<sup>b</sup>Nicolaus Copernicus University, Faculty of Chemistry, Gagarina 7, 87-100 Torun, Poland

<sup>c</sup>Department of Pharmaceutical Biochemistry, Faculty of Pharmacy, Medical University of Lodz, Muszynski 1 Str., 90-151 Lodz, Poland

<sup>d</sup>Department of Cosmetic Raw Materials Chemistry, Faculty of Pharmacy, Medical University of Lodz, Muszynski 1 Str., 90-151 Lodz, Poland

#### Table of Contents

**Table S1.** FAB-MS data (m/z) of the complexes **1a–9a**, **1b–9b**.

**Table S2.** Selected bonds lengths (Å) and valence angles (°) for (**1a**), (**6a**), (**8a**) and (**5b**).

**Table S3.** Dihedral angles between rings in organic ligands.

**Figure S1.** Crystal network of (**1a**) along *a* axis. For clarity of the figure all hydrogen atoms are omitted.

**Figure S2.** Crystal network of (**6a**) viewed along *a* axis.

**Figure S3.** Crystal network of (**5b**) along *a* axis. For clarity of the figure all hydrogen atoms are omitted.

**Table S1.** FAB-MS data (m/z) of the complexes **1a– 9a, 1b– 9b**.

| compound  | molecular ion | (m/z) fragment ions                                                                                                                                                                                       |
|-----------|---------------|-----------------------------------------------------------------------------------------------------------------------------------------------------------------------------------------------------------|
| <b>1a</b> | -             | 256.1 [4a] <sup>+</sup> , 313.1 [4aCo] <sup>+</sup> , 349.1 [4aCoCl] <sup>+</sup>                                                                                                                         |
| <b>2a</b> | -             | 256.0 [4a] <sup>+</sup> , 314.0 [4aCo] <sup>+</sup> , 376.1 [4aCoNO <sub>3</sub> ] <sup>+</sup>                                                                                                           |
| <b>3a</b> | -             | 256.2 [4a] <sup>+</sup> , 313.1 [4aCo] <sup>+</sup> , 413.2 [4aCoClO <sub>4</sub> ] <sup>+</sup> , 569.3 [(4a) <sub>2</sub> Co] <sup>+</sup> , 668.2 [(4a) <sub>2</sub> CoClO <sub>4</sub> ] <sup>+</sup> |
| <b>5a</b> | -             | 256.0 [4a] <sup>+</sup> , 314.0 [4aNi] <sup>+</sup> , 375.1 [4aNiNO <sub>3</sub> ] <sup>+</sup>                                                                                                           |
| <b>6a</b> | -             | 256.0 [4a] <sup>+</sup> , 313.1 [4aNi] <sup>+</sup> , 412.1 [4aNiClO <sub>4</sub> ] <sup>+</sup> , 568.1 [(4a) <sub>2</sub> Ni] <sup>+</sup> , 667.1 [(4a) <sub>2</sub> NiClO <sub>4</sub> ] <sup>+</sup> |
| <b>7a</b> | -             | 256.1 [4a] <sup>+</sup> , 318.0 [4aCu] <sup>+</sup> , 353.0 [4aCuCl] <sup>+</sup>                                                                                                                         |
| <b>8a</b> | -             | 318.2 [4aCu] <sup>+</sup> , 573.3 [(4a) <sub>2</sub> Cu] <sup>+</sup> , 637.3 [(4a) <sub>2</sub> CuNO <sub>3</sub> ] <sup>+</sup>                                                                         |
| <b>9a</b> | -             | 256.2 [4a] <sup>+</sup> , 318.1 [4aCu] <sup>+</sup> , 418.1 [4aCuClO <sub>4</sub> ] <sup>+</sup> , 574.3 [(4a) <sub>2</sub> Cu] <sup>+</sup>                                                              |
| <b>1b</b> | -             | 249.0 [5aCoCl] <sup>+</sup> , 404.1 [(5a) <sub>2</sub> CoCl] <sup>+</sup>                                                                                                                                 |
| <b>3b</b> | -             | 213.0 [5aCo] <sup>+</sup> , 313.0 [5aCoClO <sub>4</sub> ] <sup>+</sup> , 368.0 [(5a) <sub>2</sub> Co] <sup>+</sup> , 468.0 [(5a) <sub>2</sub> CoClO <sub>4</sub> ] <sup>+</sup>                           |
| <b>4b</b> | -             | 213.0 [5aNi] <sup>+</sup> , 249.0 [5aNiCl] <sup>+</sup>                                                                                                                                                   |
| <b>5b</b> | -             | 213.0 [5aNi] <sup>+</sup> , 275.0 [5aNiNO <sub>3</sub> ] <sup>+</sup> , 369.1 [(4a) <sub>2</sub> Ni] <sup>+</sup> , 430.2 [(5a) <sub>2</sub> NiNO <sub>3</sub> ] <sup>+</sup>                             |
| <b>6b</b> | -             | 213.0 214.0 [5aNi] <sup>+</sup> , 367.0 [(4a) <sub>2</sub> Ni] <sup>+</sup> , 467.0 [(5a) <sub>2</sub> NiClO <sub>4</sub> ] <sup>+</sup>                                                                  |
| <b>8b</b> | -             | 218.0 [5aCu] <sup>+</sup> , 281.1 [5aCuNO <sub>3</sub> ] <sup>+</sup> , 437.2 [(5a) <sub>2</sub> CuNO <sub>3</sub> ] <sup>+</sup>                                                                         |
| <b>9b</b> | -             | 219.0 [5aCu] <sup>2+</sup> , 473.1 [(5a) <sub>2</sub> CuClO <sub>4</sub> ] <sup>+</sup>                                                                                                                   |

**Table S2.** Selected bonds lengths (Å) and valence angles (°) for **(1a)**, **(6a)**, **(8a)** and **(5b)**.

| Complex              | 1a         | 6a                                             | 8a                                                | 5b                     |
|----------------------|------------|------------------------------------------------|---------------------------------------------------|------------------------|
| <b>Distances [Å]</b> |            |                                                |                                                   |                        |
| Co1-N1               | 2.0087(19) | Ni1-O4 2.0692(17)                              | Cu1-N11 1.982(3)                                  | Ni1-N11 2.033(5)       |
| Co1-N10              | 2.0782(18) | Ni1-O4 <sup>i</sup> 2.0692(17)                 | Cu1-N1 1.984(3)                                   | Ni1-N1 2.070(6)        |
| Co1-Cl2              | 2.2064(6)  | Ni1-N1 <sup>i</sup> 2.091(2)                   | Cu1-O3 1.988(3)                                   | Ni1-O43 2.100(5)       |
| Co1-Cl3              | 2.2090(6)  | Ni1-N1 2.091(2)                                | Cu1-N20 2.045(3)                                  | Ni1-O42 2.212(6)       |
|                      |            | Ni1-N10 <sup>i</sup> 2.1417(18)                | Cu1-N10 2.275(3)                                  | Ni1-S7 2.333(3)        |
|                      |            | Ni1-N10 2.1417(18)                             | Cu2-O31 1.975(4)                                  | Ni1-S17 2.336(2)       |
|                      |            |                                                | Cu2-O31 <sup>i</sup> 1.975(4)                     | Ni2-N31 2.039(6)       |
|                      |            |                                                | Cu2-O34 1.984(4)                                  | Ni2-N21 2.058(6)       |
|                      |            |                                                | Cu2-O34 <sup>i</sup> 1.984(4)                     | Ni2-O46 2.136(5)       |
|                      |            |                                                |                                                   | Ni2-O47 2.153(5)       |
|                      |            |                                                |                                                   | Ni2-S37 2.372(2)       |
|                      |            |                                                |                                                   | Ni2-S27 2.374(2)       |
| <b>Angles [°]</b>    |            |                                                |                                                   |                        |
| N1-Co1-N10           | 80.28(7)   | O4-Ni1-O4 <sup>i</sup> 86.75(11)               | N11-Cu1-N1 173.98(12)                             | N11-Ni1-N1 178.7(2)    |
| N1-Co1-Cl2           | 112.26(5)  | O4-Ni1-N1 <sup>i</sup> 92.21(7)                | N11-Cu1-O3 91.86(12)                              | N11-Ni1-O43 86.7(2)    |
| N10-Co1-Cl2          | 116.02(5)  | O4 <sup>i</sup> -Ni1-N1 <sup>i</sup> 85.25(7)  | N1-Cu1-O3 89.08(11)                               | N1-Ni1-O43 93.6(2)     |
| N1-Co1-Cl3           | 110.43(5)  | O4-Ni1-N1 85.25(7)                             | N11-Cu1-N20 80.61(12)                             | N11-Ni1-O42 91.4(2)    |
| N10-Co1-Cl3          | 118.90(5)  | O4 <sup>i</sup> -Ni1-N1 92.21(7)               | N1-Cu1-N20 96.74(12)                              | N1-Ni1-O42 87.7(2)     |
| Cl2-Co1-Cl3          | 113.98(3)  | N1 <sup>i</sup> -Ni1-N1 176.51(9)              | O3-Cu1-N20 161.67(12)                             | O43-Ni1-O42 59.6(2)    |
|                      |            | O4-Ni1-N10 <sup>i</sup> 170.11(7)              | N11-Cu1-N10 108.42(12)                            | N11-Ni1-S7 96.46(17)   |
|                      |            | O4 <sup>i</sup> -Ni1-N10 <sup>i</sup> 94.96(8) | N1-Cu1-N10 77.50(11)                              | N1-Ni1-S7 82.83(18)    |
|                      |            | N1 <sup>i</sup> -Ni1-N10 <sup>i</sup> 78.25(7) | O3-Cu1-N10 91.34(11)                              | O43-Ni1-S7 163.48(18)  |
|                      |            | N1-Ni1-N10 <sup>i</sup> 104.39(7)              | N20-Cu1-N10 106.88(11)                            | O42-Ni1-S7 104.1(2)    |
|                      |            | O4-Ni1-N10 94.96(8)                            | O31-Cu2-O31 <sup>i</sup> 92.9(2)                  | N11-Ni1-S17 82.44(17)  |
|                      |            | O4 <sup>i</sup> -Ni1-N10 170.11(7)             | O31-Cu2-O34 158.46(15)                            | N1-Ni1-S17 98.81(19)   |
|                      |            | N1 <sup>i</sup> -Ni1-N10 104.39(7)             | O31 <sup>i</sup> -Cu2-O34 91.53(16)               | O43-Ni1-S17 93.76(17)  |
|                      |            | N1-Ni1-N10 78.25(7)                            | O31-Cu2-O34 <sup>i</sup> 91.53(16)                | O42-Ni1-S17 153.0(2)   |
|                      |            | N10 <sup>i</sup> -Ni1-N10 85.03(10)            | O31 <sup>i</sup> -Cu2-O34 <sup>i</sup> 158.47(15) | S7-Ni1-S17 102.71(10)  |
|                      |            |                                                | O34-Cu2-O34 <sup>i</sup> 92.1(2)                  | N31-Ni2-N21 176.1(3)   |
|                      |            |                                                |                                                   | N31-Ni2-O46 88.4(2)    |
|                      |            |                                                |                                                   | N21-Ni2-O46 92.9(2)    |
|                      |            |                                                |                                                   | N31-Ni2-O47 92.5(2)    |
|                      |            |                                                |                                                   | N21-Ni2-O47 91.4(2)    |
|                      |            |                                                |                                                   | O46-Ni2-O47 59.7(2)    |
|                      |            |                                                |                                                   | N31-Ni2-S37 83.64(19)  |
|                      |            |                                                |                                                   | N21-Ni2-S37 92.58(19)  |
|                      |            |                                                |                                                   | O46-Ni2-S37 95.59(19)  |
|                      |            |                                                |                                                   | O47-Ni2-S37 155.2(2)   |
|                      |            |                                                |                                                   | N31-Ni2-S27 96.77(18)  |
|                      |            |                                                |                                                   | N21-Ni2-S27 83.26(18)  |
|                      |            |                                                |                                                   | O46-Ni2-S27 159.04(19) |
|                      |            |                                                |                                                   | O47-Ni2-S27 99.68(19)  |
|                      |            |                                                |                                                   | S37-Ni2-S27 105.14(9)  |

**(6a)**<sup>i</sup> -x+1, y, -z+1/2; **(8a)**<sup>i</sup> -x, y, -z+1/2

**Table. S3.** Dihedral angles between rings in organic ligands.

| parameter                         | (1a)  | (6a)  | (8a)      |            | (5b)      |            |            |            |
|-----------------------------------|-------|-------|-----------|------------|-----------|------------|------------|------------|
|                                   |       |       | N1 ligand | N11 ligand | N1 ligand | N11 ligand | N21 ligand | N31 ligand |
| N1 <sub>p</sub> /N1 <sub>ch</sub> | 1.24  | 4.73  | 10.91     | 5.76       | 13.2      | 11.2       | 10.9       | 11.7       |
| N1 <sub>ch</sub> /S7              | 0.77  | 12.54 | 14.71     | 13.80      | ----      | ----       | ----       | ----       |
| S7/C91                            | 8.59  | 55.67 | 41.3      | 30.8       | ----      | ----       | ----       | ----       |
| N1 <sub>p</sub> /S7               | 1.01  | 14.52 | 17.7      | 14.0       | ----      | ----       | ----       | ----       |
| N1 <sub>p</sub> /C91              | 7.89  | 69.67 | 52.6      | 41.3       | ----      | ----       | ----       | ----       |
| N1 <sub>ch</sub> /C91             | 9.12  | 68.20 | 55.3      | 43.75      | ----      | ----       | ----       | ----       |
| Rms(N1 <sub>p</sub> )             | 0.002 | 0.003 | 0.006     | 0.005      | 0.011     | 0.009      | 0.012      | 0.003      |
| Rms(N1 <sub>ch</sub> )            | 0.010 | 0.032 | 0.058     | 0.084      | 0.100     | 0.110      | 0.090      | 0.141      |
| Rms(S7)                           | 0.001 | 0.003 | 0.008     | 0.014      | ----      | ----       | ----       | ----       |
| Rms(C91)                          | 0.003 | 0.001 | 0.007     | 0.004      | ----      | ----       | ----       | ----       |

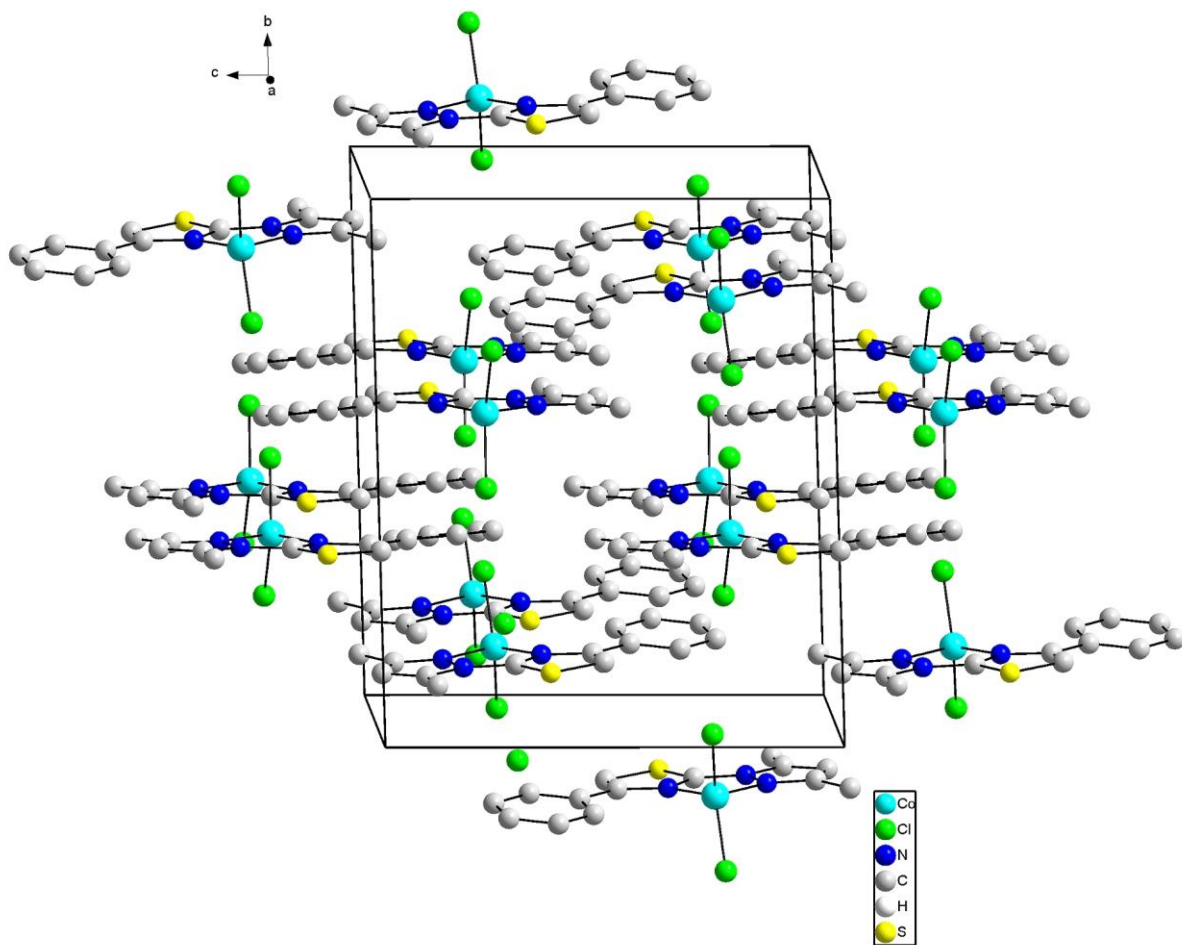

**Figure S1.** Crystal network of (1a) along *a* axis. For clarity of the figure all hydrogen atoms are omitted.

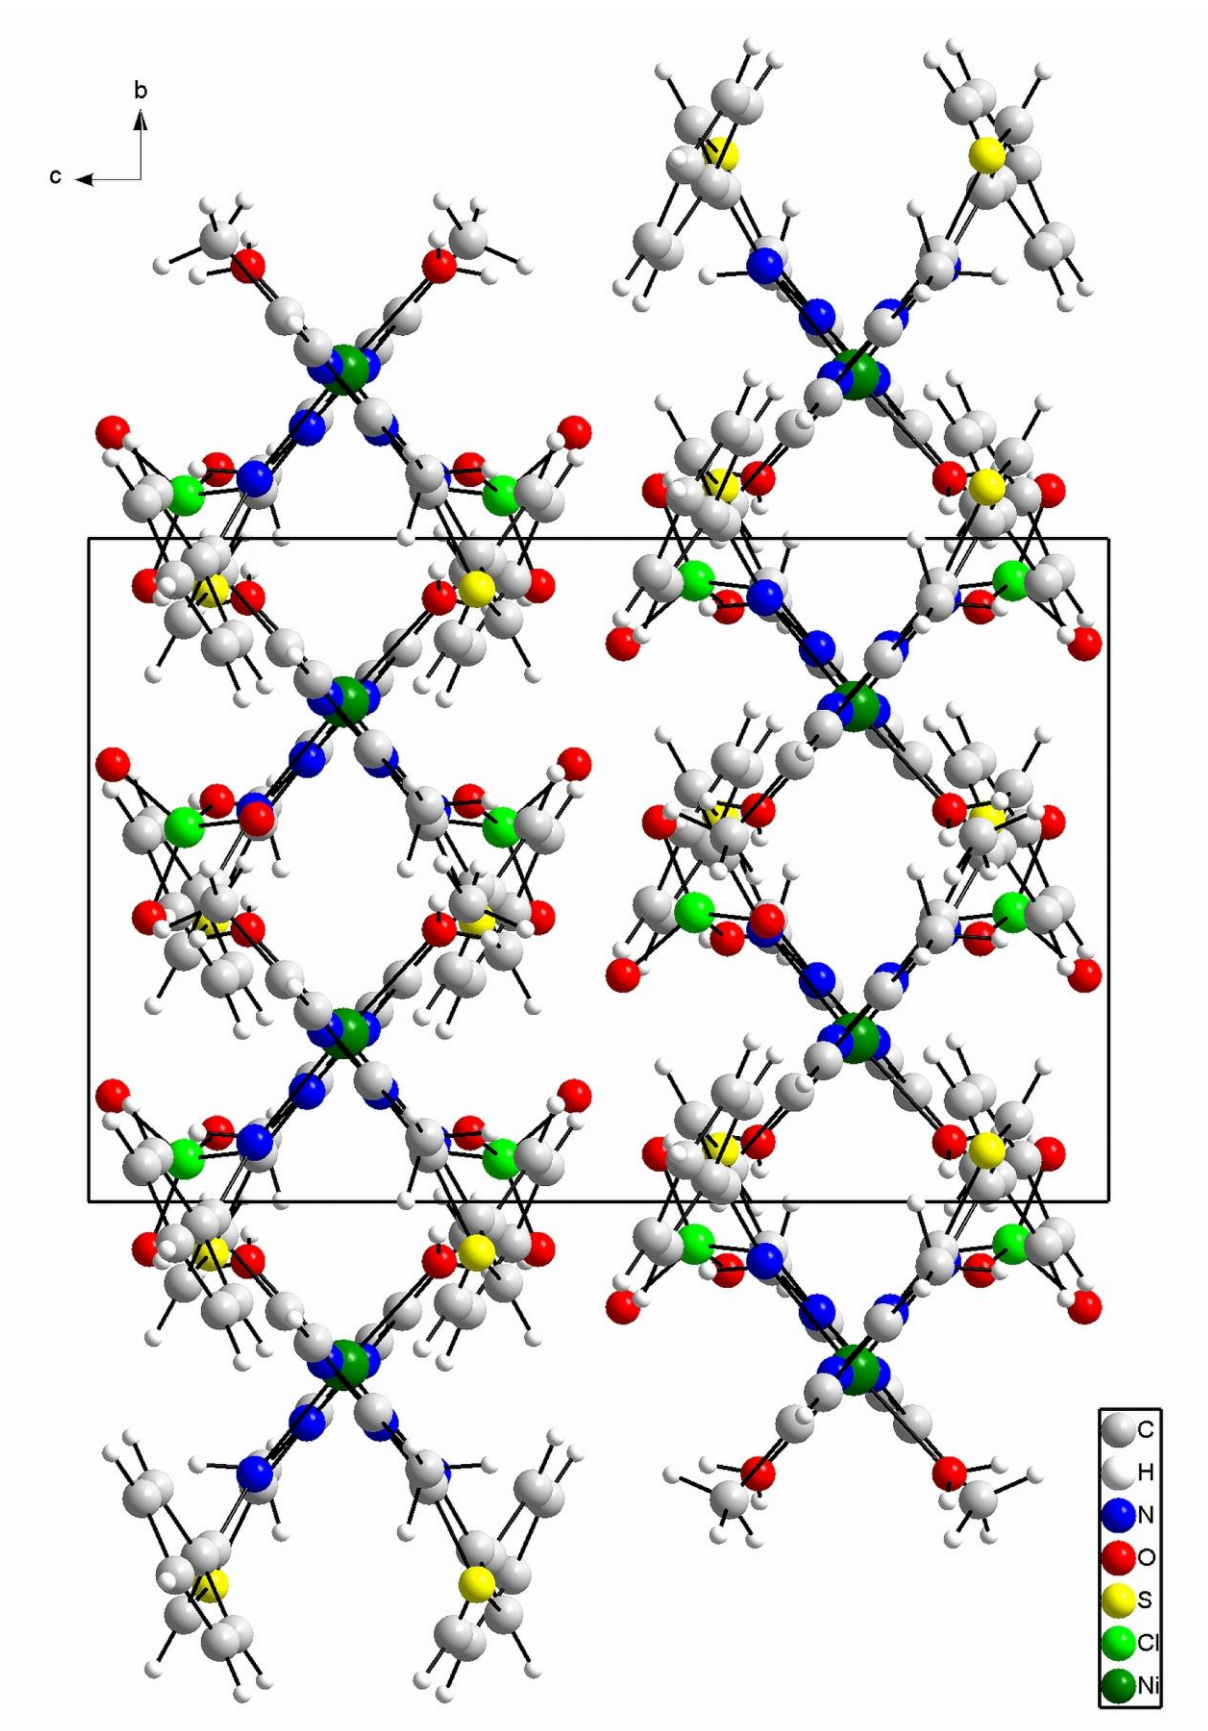

**Figure S2.** Crystal network of (6a) viewed along *a* axis.

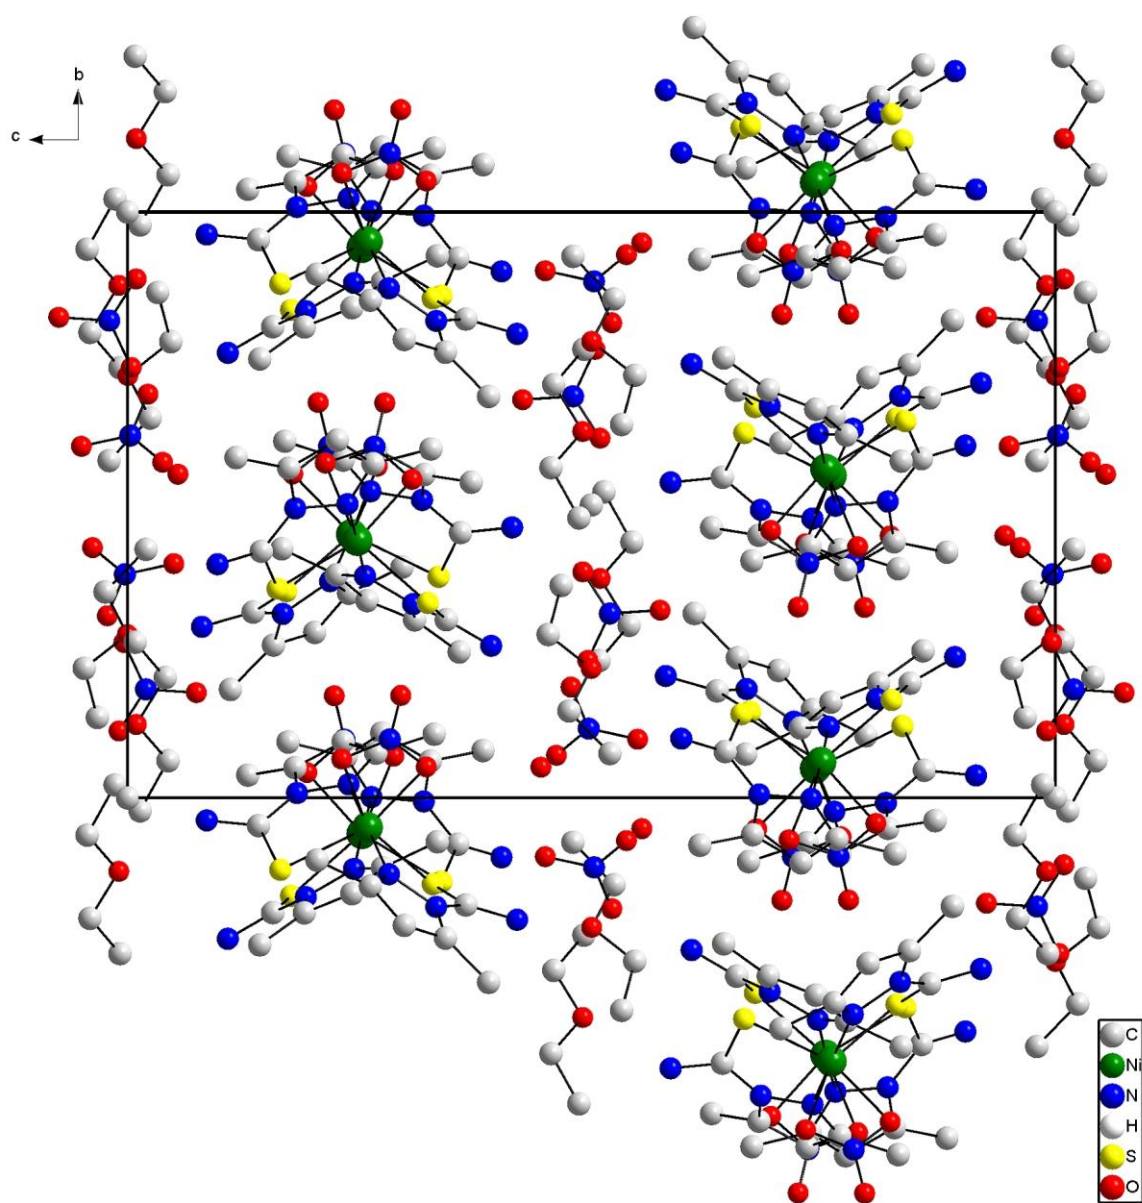

**Figure S3.** Crystal network of (5b) along *a* axis. For clarity of the figure all hydrogen atoms are omitted.
